# Supplementary material
Source: publisher figshare collection journal article supplement (https://geolsoc.figshare.com/articles/dataset/_/3454961)

SP: 1.0  
Offset: 0 1000 2000 3000 4000 5000 6000 7000 8000 9000 10000 11000 12000 13000 14000 15000 16000 17000 18000 19000 20000

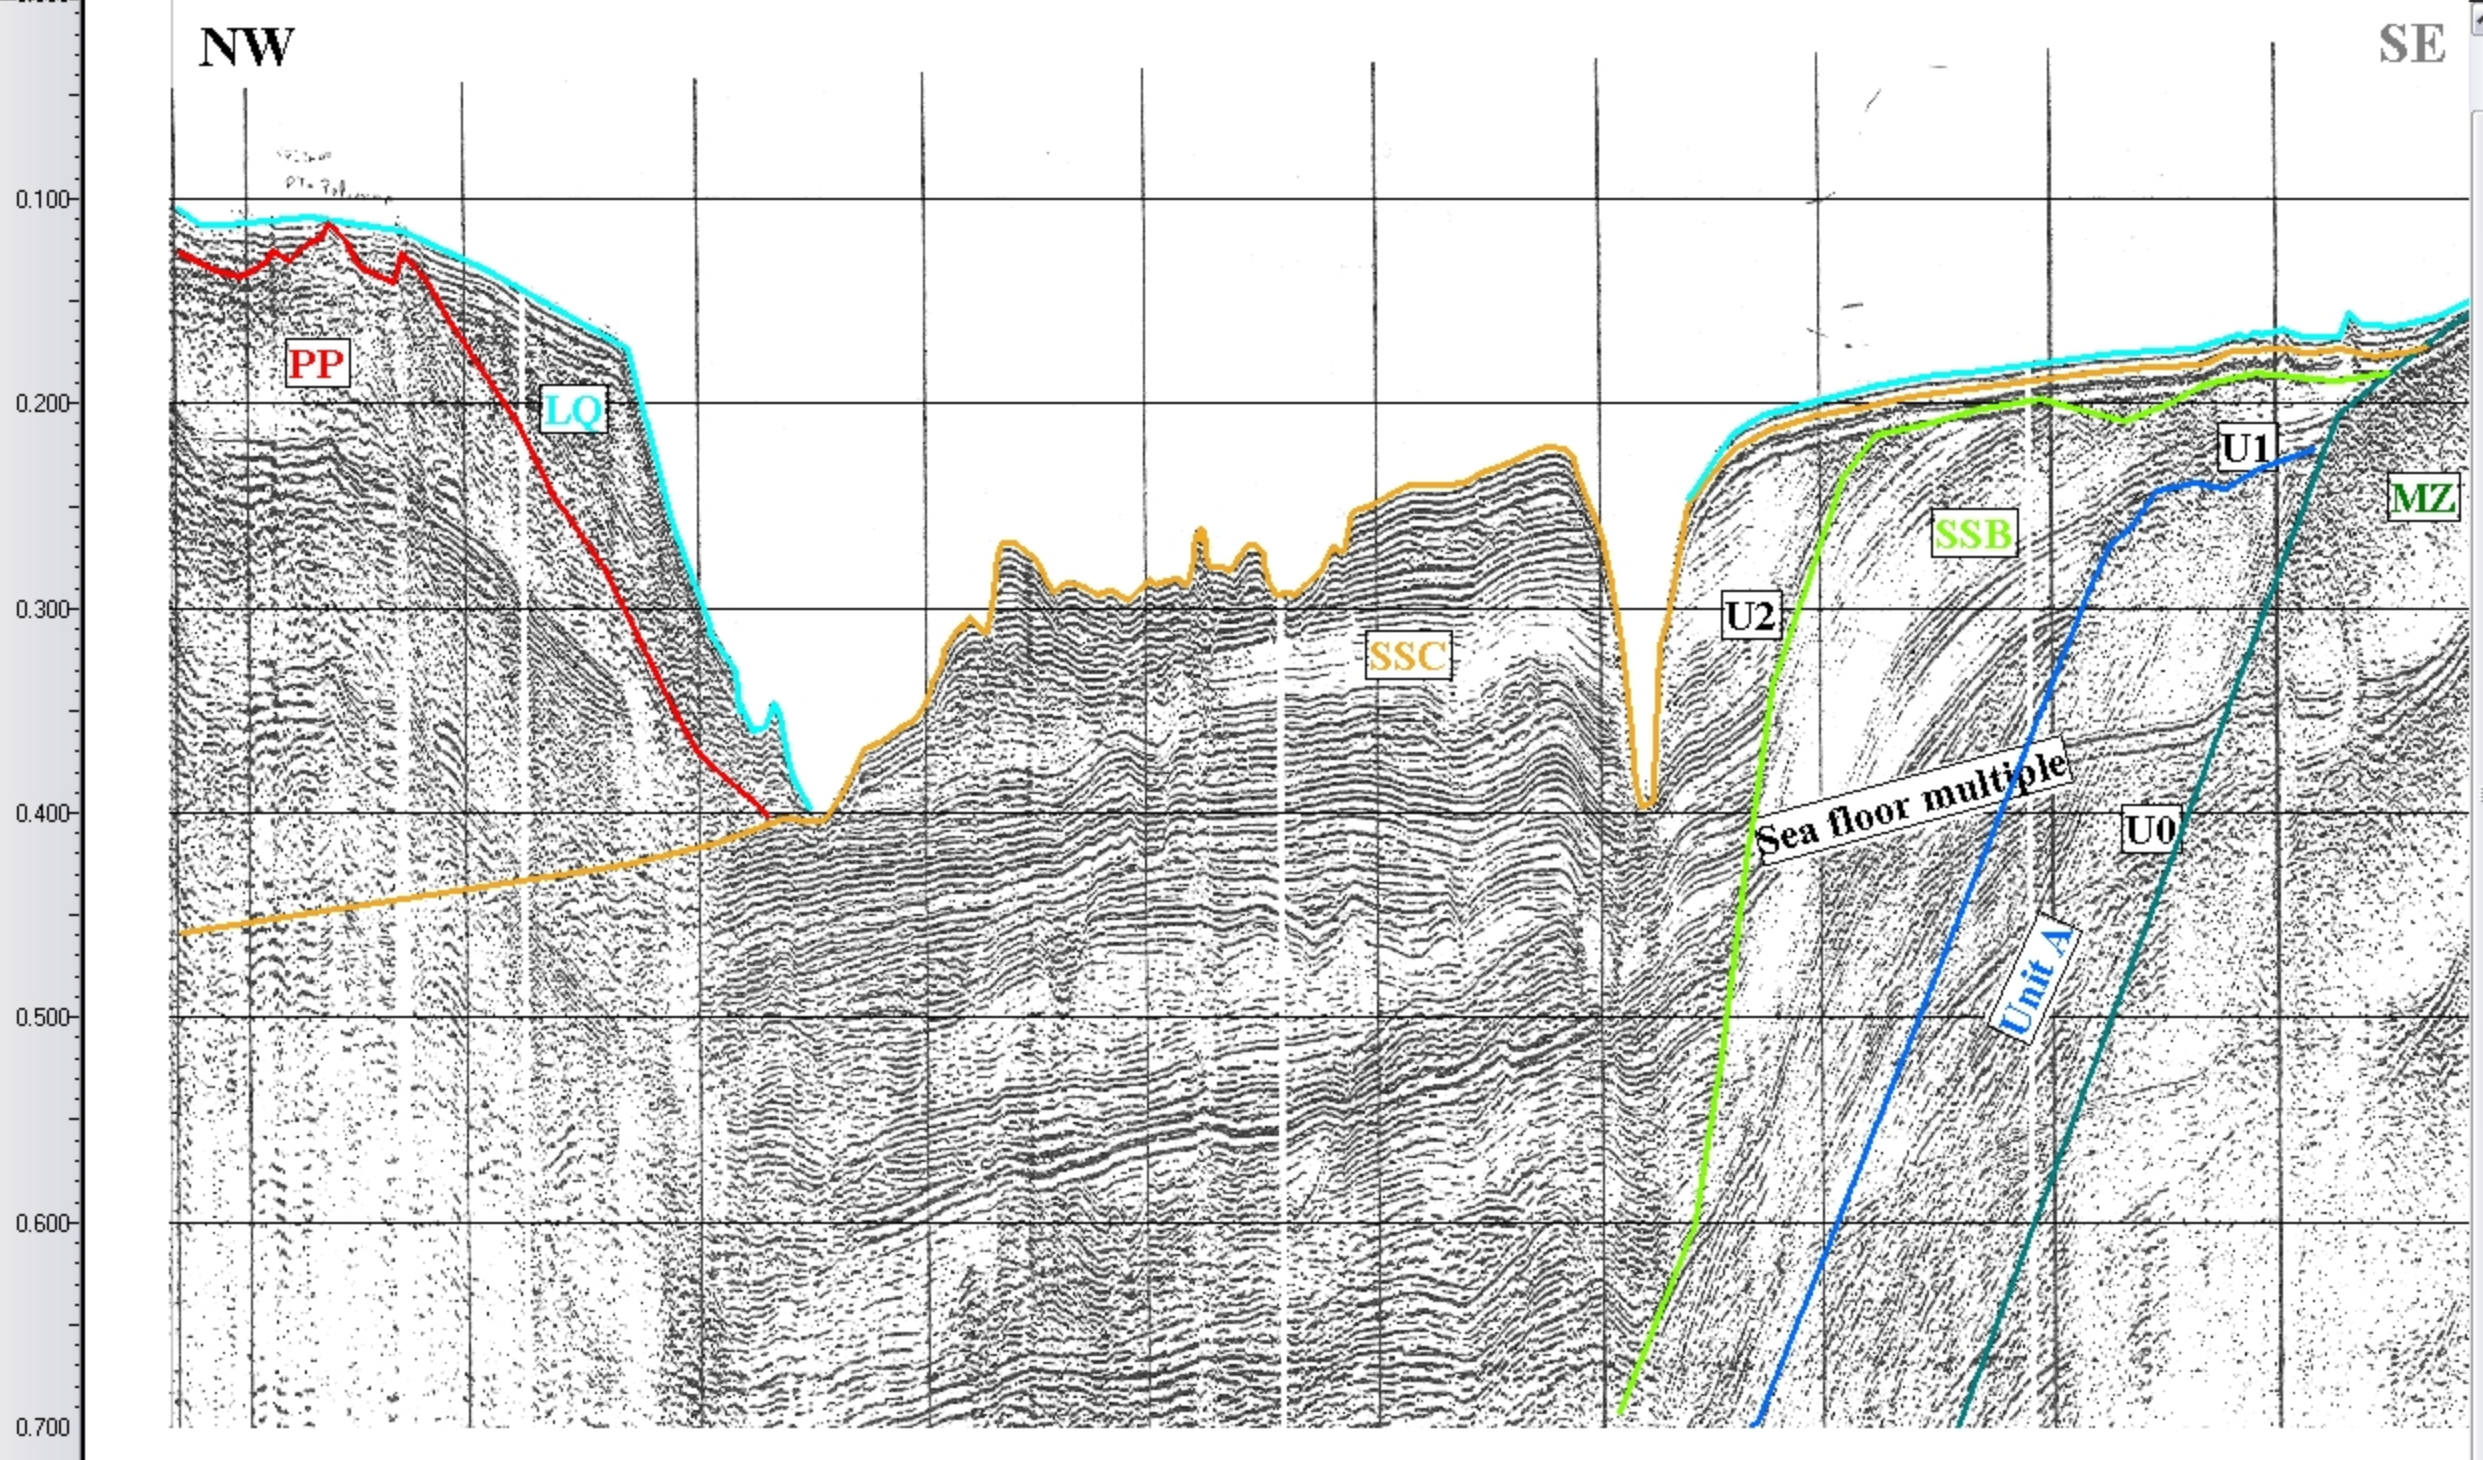

Supplement: Supplementary file 1 [file 1]

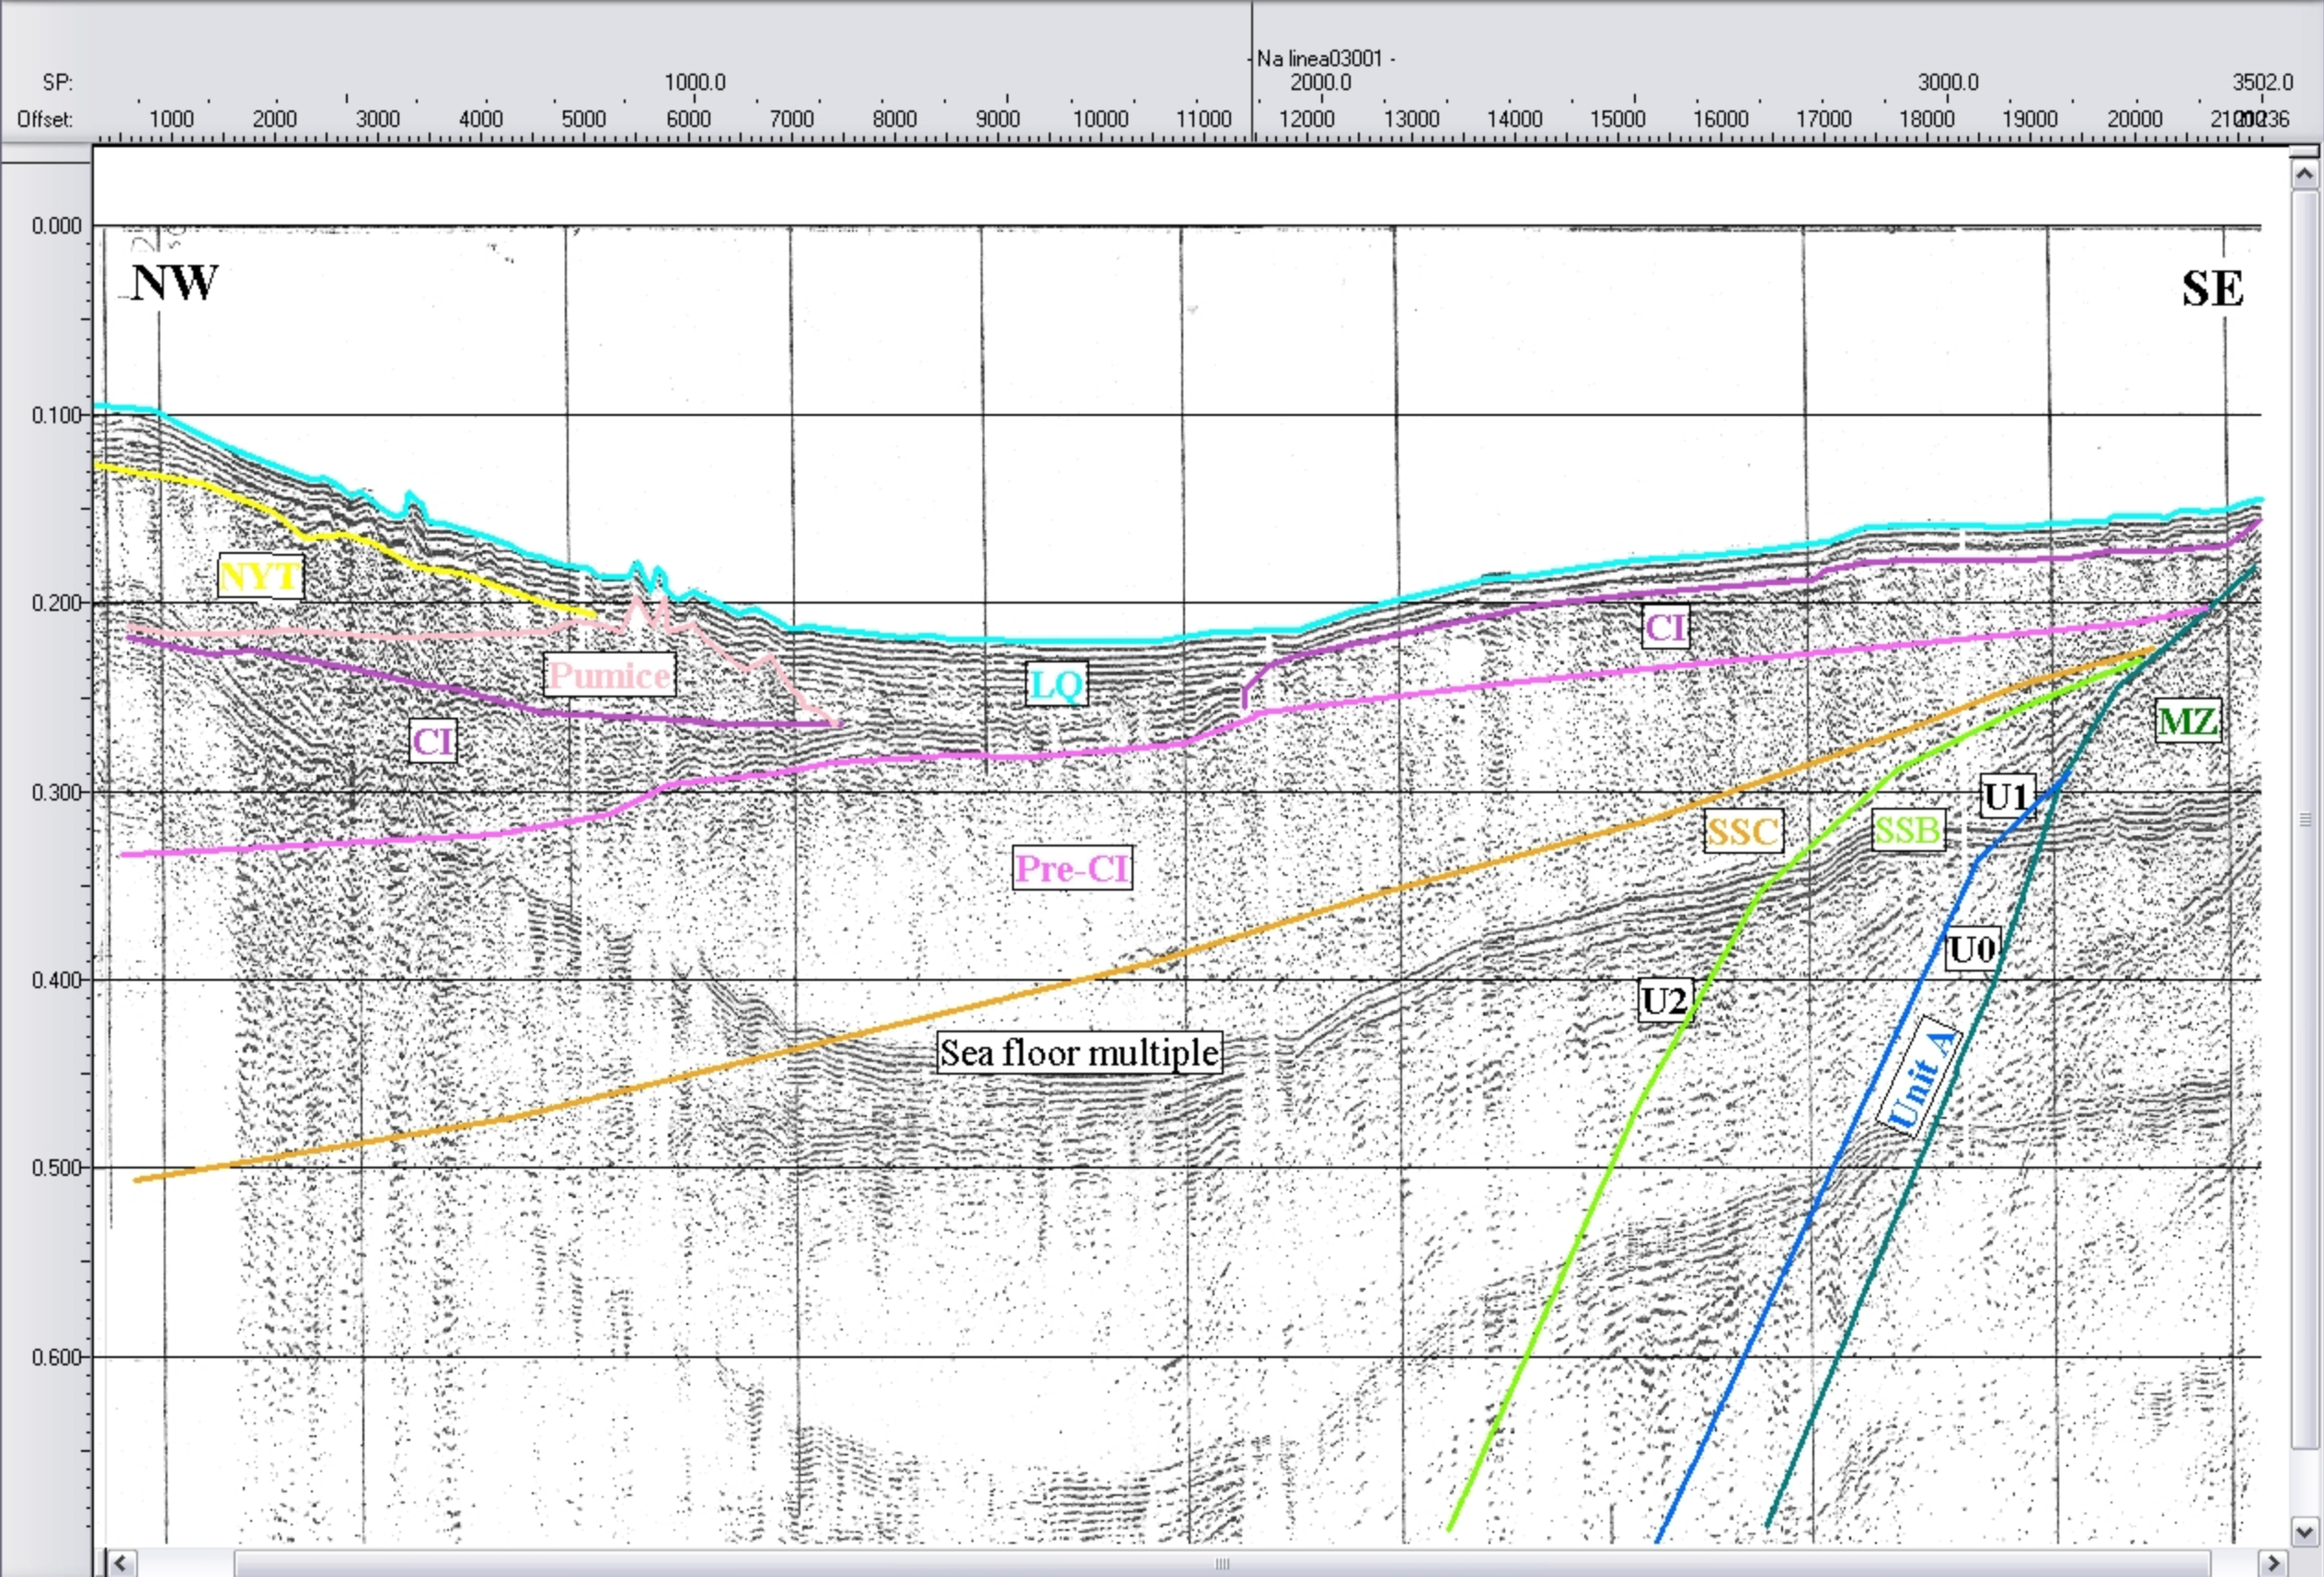

Supplement: Supplementary file 2 [file 1]

SP: 3088.03000.0

- Na linea 05001 -  
2000.0

1000.0

1.0

Offset:

0 1000 2000 3000 4000 5000 6000 7000 8000 9000 10000 11000 12000 13000 14000 15000 16000 17000 18000 19000 20000

NW

SE

0.000  
0.100  
0.200  
0.300  
0.400  
0.500  
0.600  
0.700

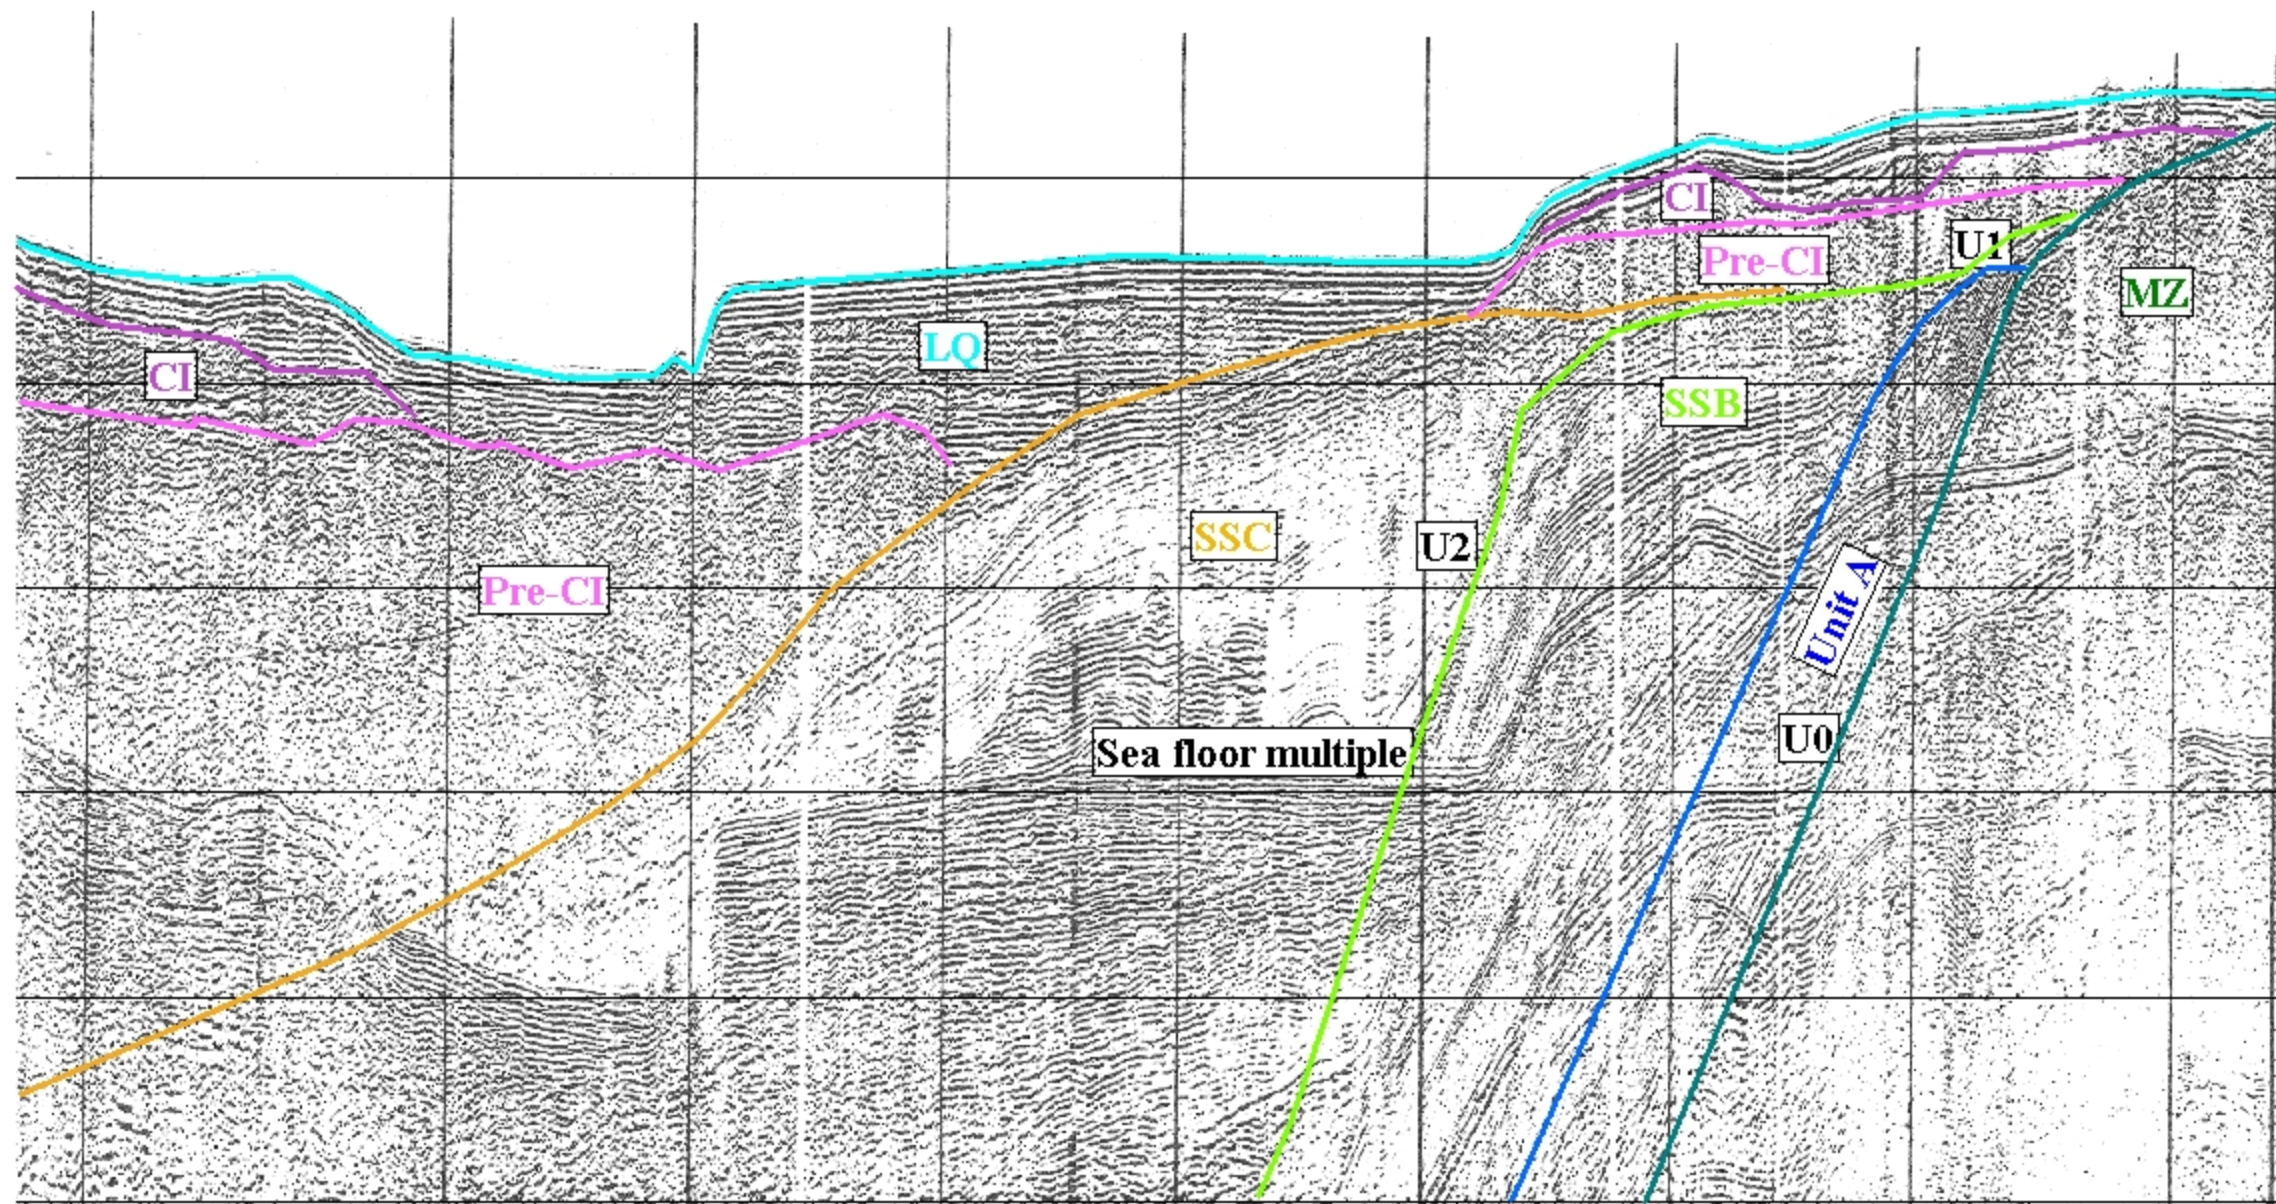

Supplement: Supplementary file 3 [file 1]
